# Supplementary material for: High photovoltaic performance of as-cast devices based on new quinoxaline-based donor–acceptor copolymers
Source: Royal Society of Chemistry journal article supplement (doi:10.1039/c7py01060e), 2017-01-01
Supplement: c7py01060e1.pdf [file c7py01060e1.pdf]

# High Photovoltaic Performance of As-casting Device Based on New Quinoxaline-based Donor-Acceptor Copolymers

Mingzhi Zhao,<sup>1,2</sup> Zi Qiao,<sup>1,2</sup> Xiaofeng Chen,<sup>1,2</sup> Chenglin Jiang,<sup>1,2</sup> Xiaoyu Li,<sup>2\*</sup>

Yongfang Li,<sup>3</sup> and Haiqiao Wang<sup>1,2\*</sup>

1. State Key Laboratory of Organic-Inorganic Composite, Beijing University of Chemical Technology, Beijing 100029, China

2. Key Laboratory of Carbon Fiber and Functional Polymers, Ministry of Education, Beijing University of Chemical Technology, Beijing 100029, China

3. Beijing National Laboratory for Molecular Sciences, Institute of Chemistry, Chinese Academy of Sciences, Beijing 100190, China

\* Corresponding author: e-mail: wanghaiqiao@mail.buct.edu.cn (H. Wang);

lixxy@mail.buct.edu.cn (X. Li)

## Content

|                                                        |           |
|--------------------------------------------------------|-----------|
| 1. GPC plot                                            | Figure S1 |
| 2. TGA plots of the polymers                           | Figure S2 |
| 3. Thin film cyclic voltammograms of polymers          | Figure S3 |
| 4. Energy level diagrams                               | Figure S4 |
| 5. Current density–voltage characteristics of the PSCs | Figure S5 |
| 6. $J^{1/2} \sim V_{\text{eff}}$ characteristics       | Figure S6 |

|                                                       |               |
|-------------------------------------------------------|---------------|
| 7. AFM topography                                     | Figure S7     |
| 8. Photovoltaic performances                          | Table S1      |
| 9. $^1\text{H}$ -NMR and $^{13}\text{C}$ -NMR spectra | Figure S8-S16 |

(a)

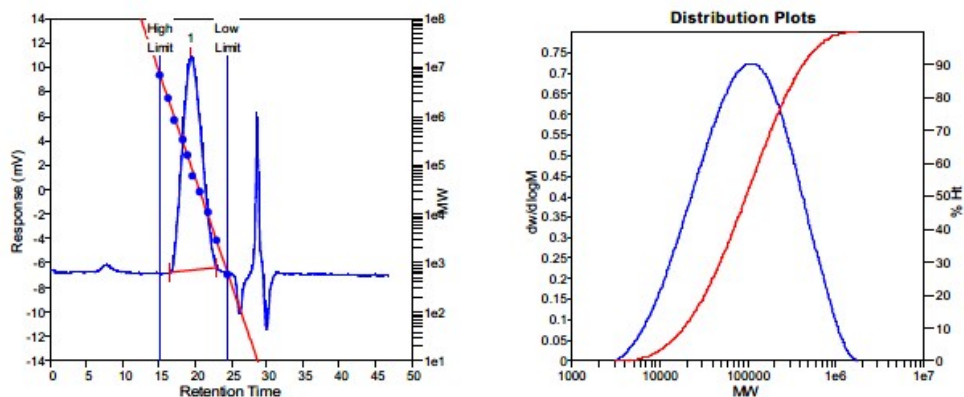

**MW Averages**

| Peak No | Mp     | Mn    | Mw     | Mz     | Mz+1   | Mv     | PD      |
|---------|--------|-------|--------|--------|--------|--------|---------|
| 1       | 108129 | 45919 | 169254 | 410043 | 654387 | 140562 | 3.68593 |

**Processed Peaks**

| Peak No | Name | Start RT (mins) | Max RT (mins) | End RT (mins) | Pk Height (mV) | % Height | Area (mV.secs) | % Area |
|---------|------|-----------------|---------------|---------------|----------------|----------|----------------|--------|
| 1       |      | 16.58           | 19.38         | 22.93         | 17.4603        | 100      | 3343.07        | 100    |

(b)

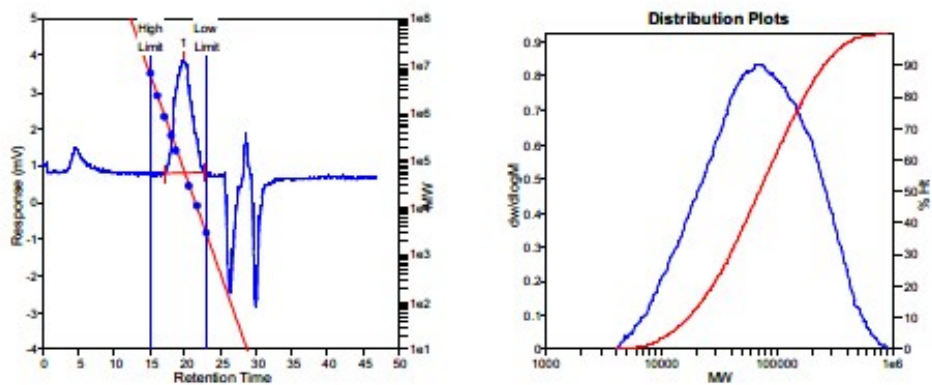

**MW Averages**

| Peak No | Mp    | Mn    | Mw     | Mz     | Mz+1   | Mv    | PD     |
|---------|-------|-------|--------|--------|--------|-------|--------|
| 1       | 70281 | 40304 | 108837 | 223197 | 341242 | 94161 | 2.7004 |

**Processed Peaks**

| Peak No | Name | Start RT (mins) | Max RT (mins) | End RT (mins) | Pk Height (mV) | % Height | Area (mV.secs) | % Area |
|---------|------|-----------------|---------------|---------------|----------------|----------|----------------|--------|
| 1       |      | 17.17           | 19.78         | 22.68         | 3.09041        | 100      | 518.688        | 100    |

**Figure S1** GPC plot of polymers: (a) PBDT-DFQX-TTSEH (b) PBDT-DFQX-TTSC8

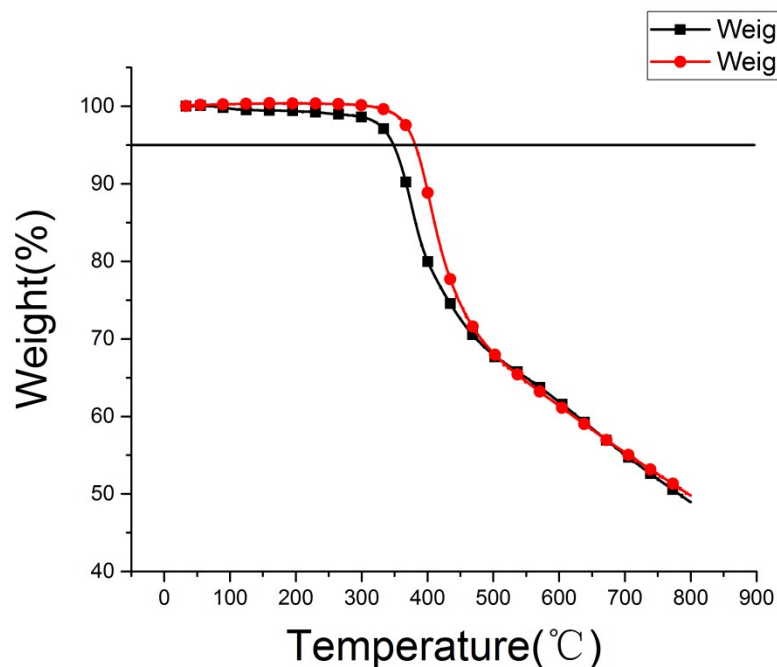

**Figure S2** TGA plots of the polymers with a heating rate of 10 C min<sup>-1</sup> under a N<sub>2</sub> atmosphere.

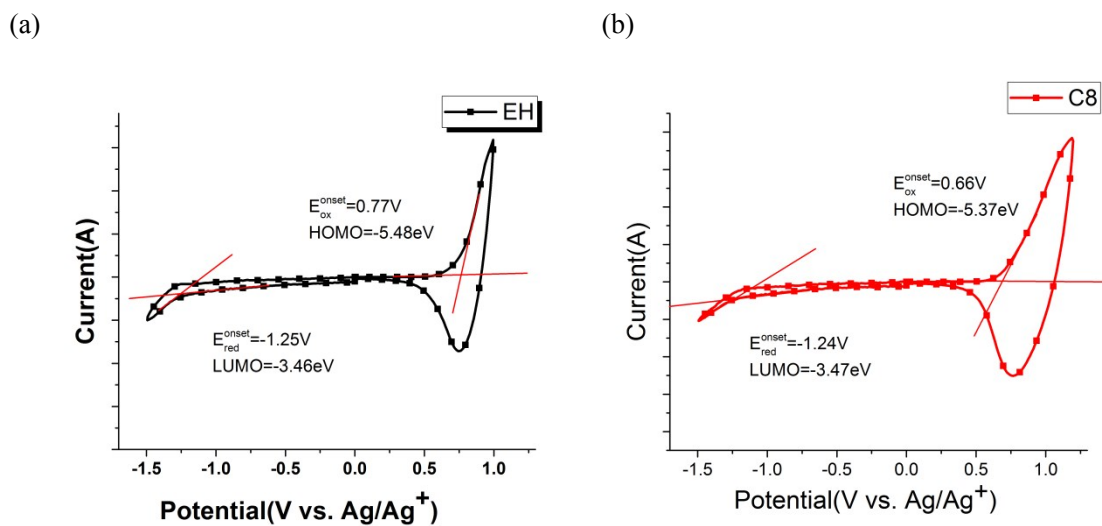

**Figure S3** Thin film cyclic voltammograms of PBDTTS-EH-Qx and PBDTTS-C8-Qx in 0.1 M Bu<sub>4</sub>NPF<sub>6</sub> acetonitrile solution at a scan rate of 100 mV·s<sup>-1</sup>

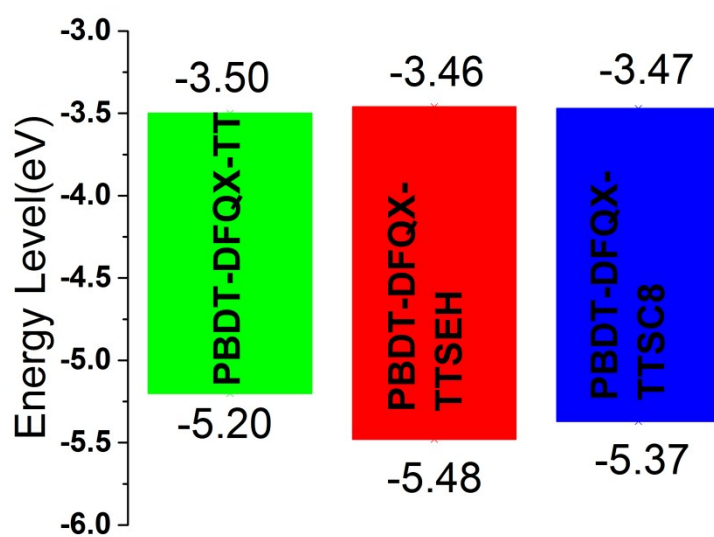

**Figure S4** Energy level diagrams for PBDT-DFQX-TT, PBDT-DFQX-TTSEH and PBDT-DFQX-TTSC8

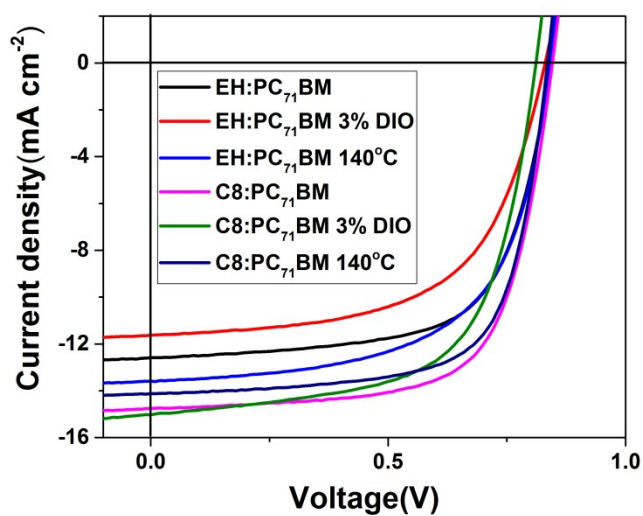

**Figure S5** Current density–voltage characteristics of the PSCs based on polymer:PC<sub>71</sub>BM blends with different treatment under illumination of AM1.5, 100 mW cm<sup>-2</sup>

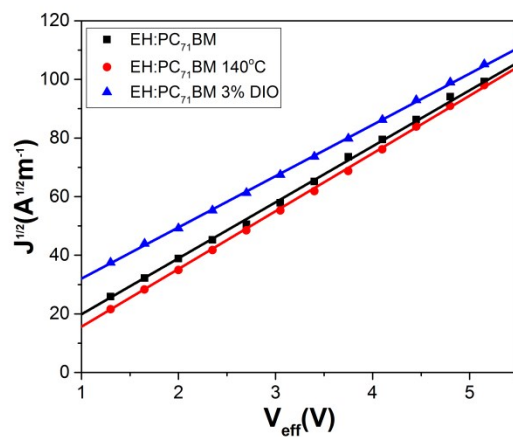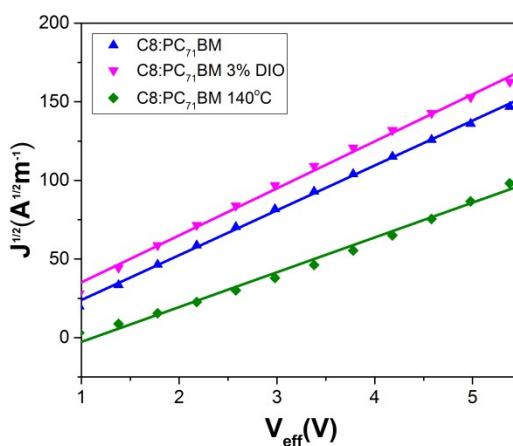

**Figure S6**  $J^{1/2} \sim V_{\text{eff}}$  characteristics for the devices based on the blend films. Solid lines were the fitting lines of the data.

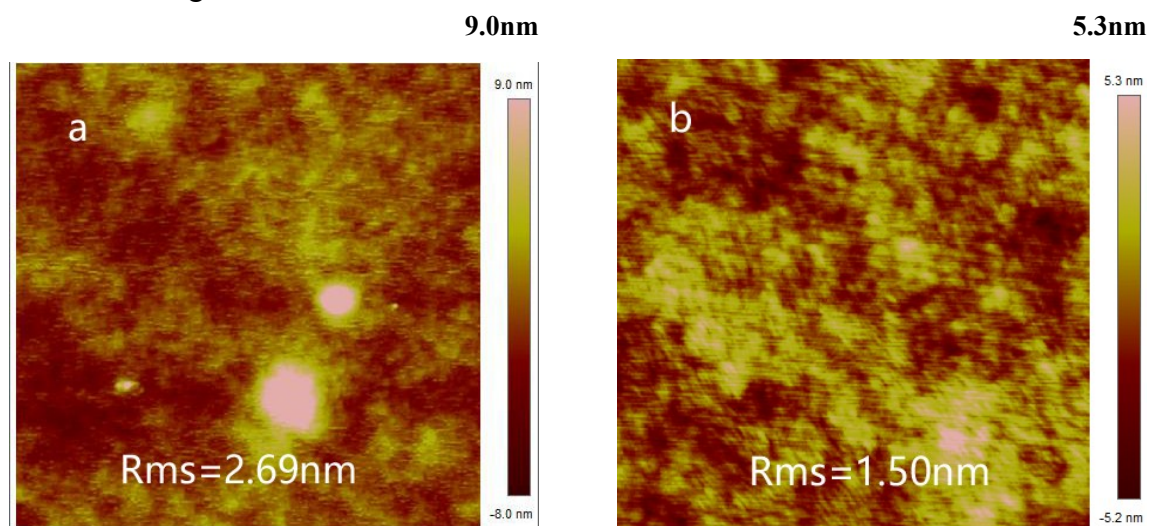

**Figure S7** AFM topography ( $2.5 \times 2.5 \mu\text{m}^2$ ) of blend films treat both with DIO and thermal annealing. (a) for PBBDT-DFQX-TTSEH (b) for PBBDT-DFQX-TTSC8

**Table S1** Photovoltaic performances of the PSCs based on polymer/PC<sub>71</sub>BM

under the illumination of AM1.5G, 100 mW·cm<sup>-2</sup>.

| Polymer | Ratio <sub>a</sub> | Treatment | $V_{oc}$ (V) | $J_{sc}$               |       |                      |
|---------|--------------------|-----------|--------------|------------------------|-------|----------------------|
|         |                    |           |              | ( $mA \cdot cm^{-2}$ ) | FF(%) | PCE <sup>b</sup> (%) |
| EH      | 1:1.2              | 3%DIO,TA  | 0.83         | 12.05                  | 59.11 | 5.94(5.47 ± 0.36)    |
| C8      | 1:1.2              | 3%DIO,TA  | 0.81         | 14.04                  | 61.54 | 6.9(6.80 ± 0.17)     |

<sup>a</sup> Polymer/PC<sub>71</sub>BM weight ratio. <sup>b</sup> Optimized data. Average data were in the parentheses and obtained from 10 devices.

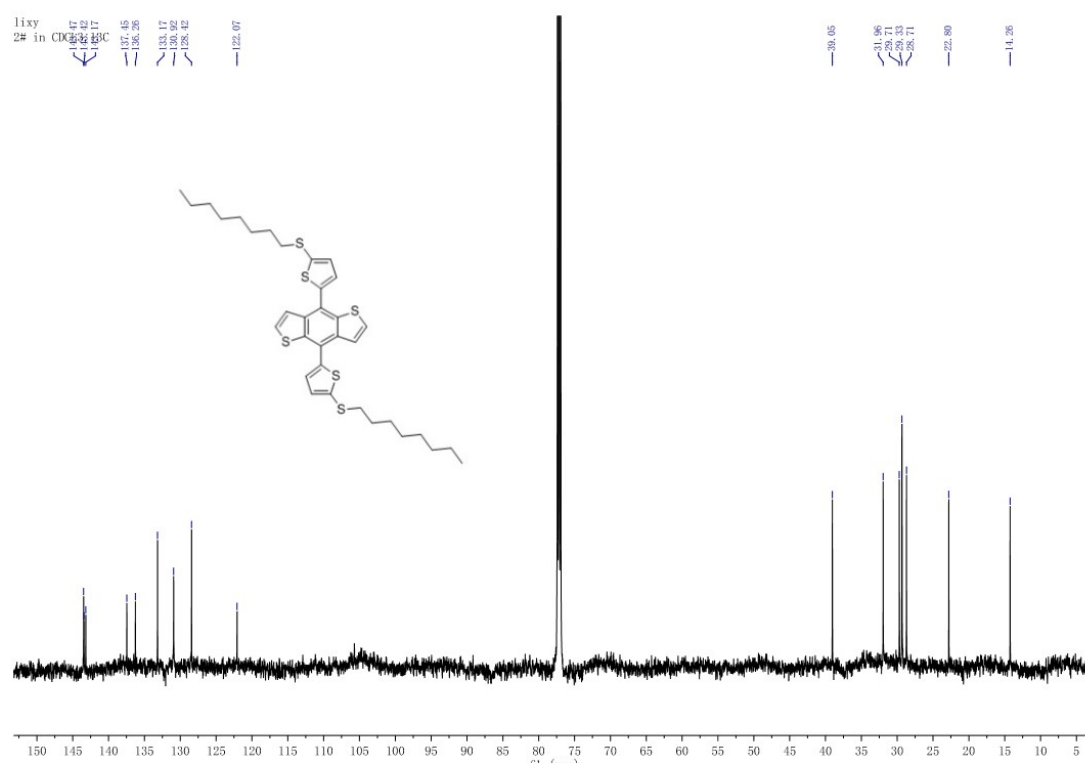

**Figure S8** 13C-NMR of BDT-TSC8

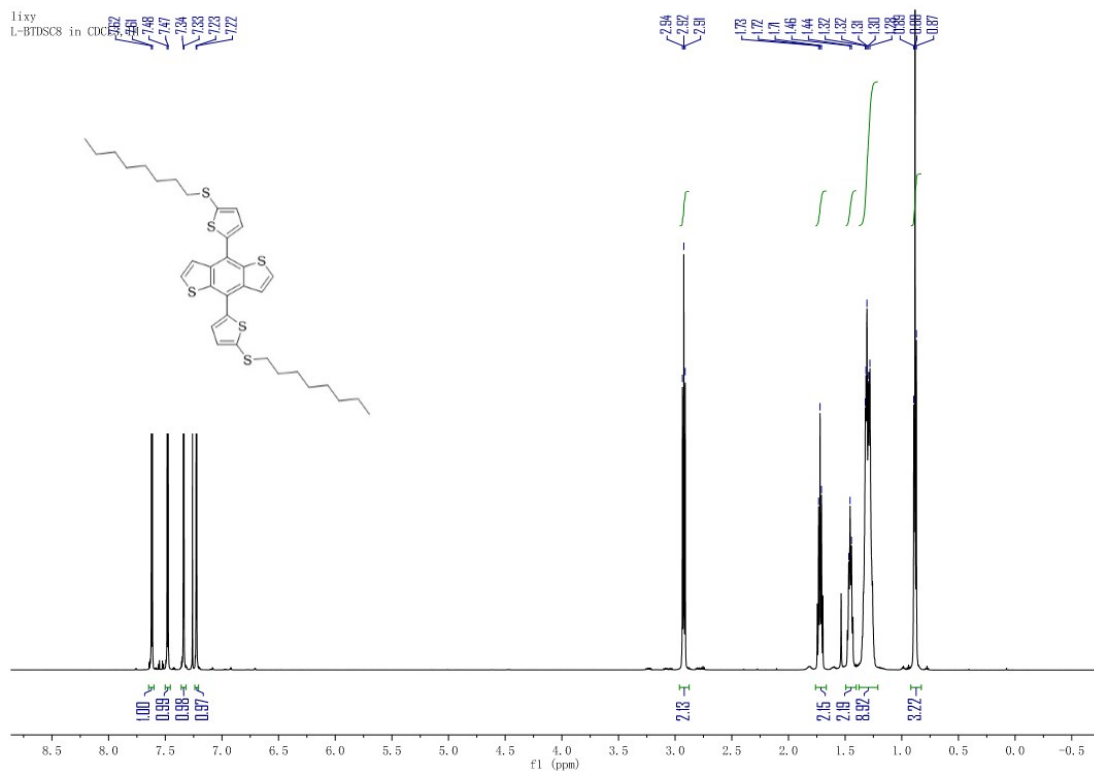

**Figure S9** <sup>1</sup>H-NMR of BDT-TSC8

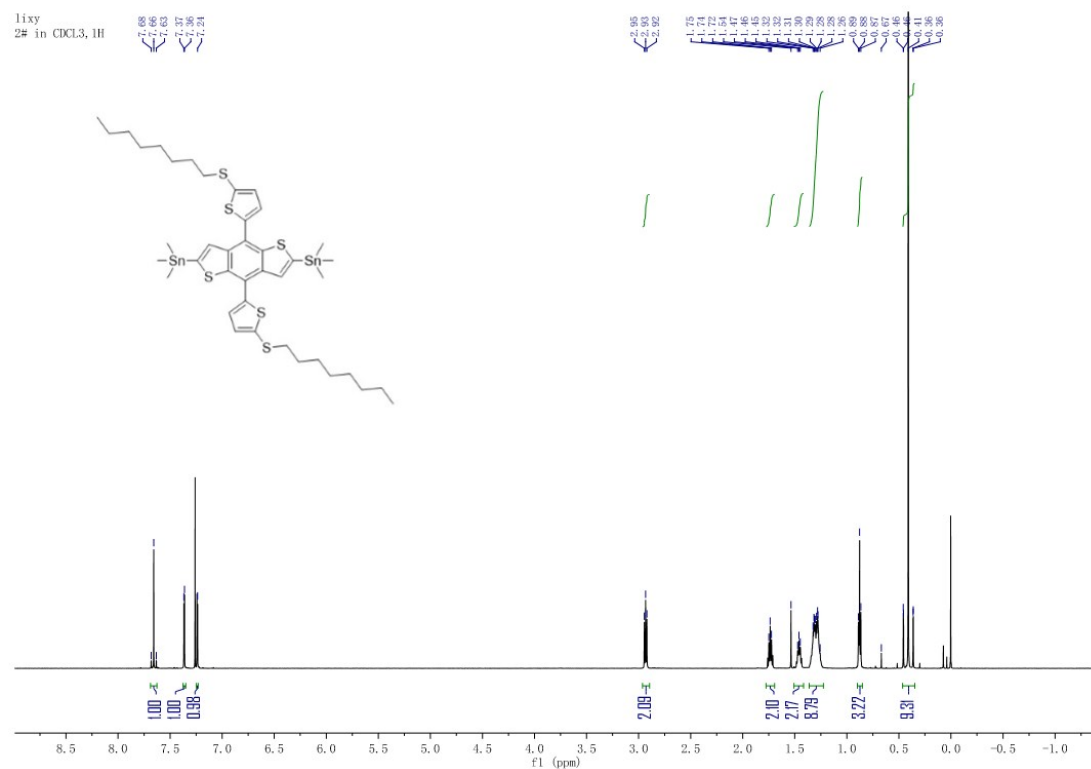

**Figure S10** <sup>1</sup>H-NMR of BDT-TSC8-2Sn



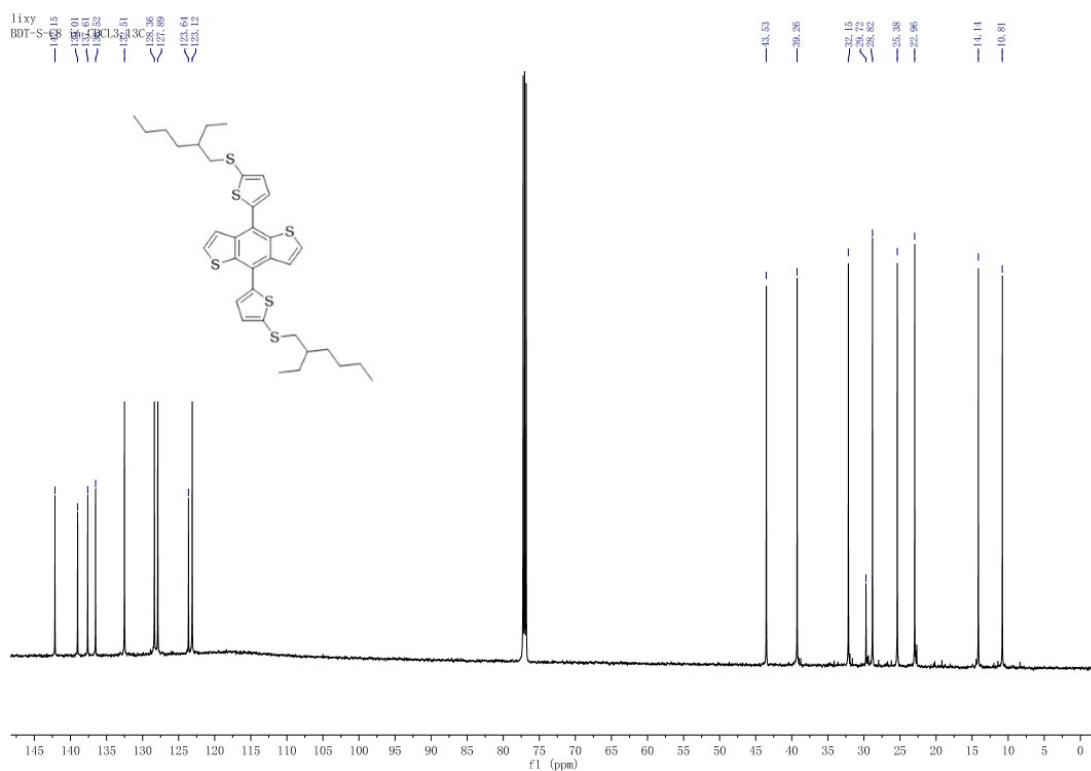

**Figure S11**  $^{13}\text{C}$ -NMR of BDT-TSEH

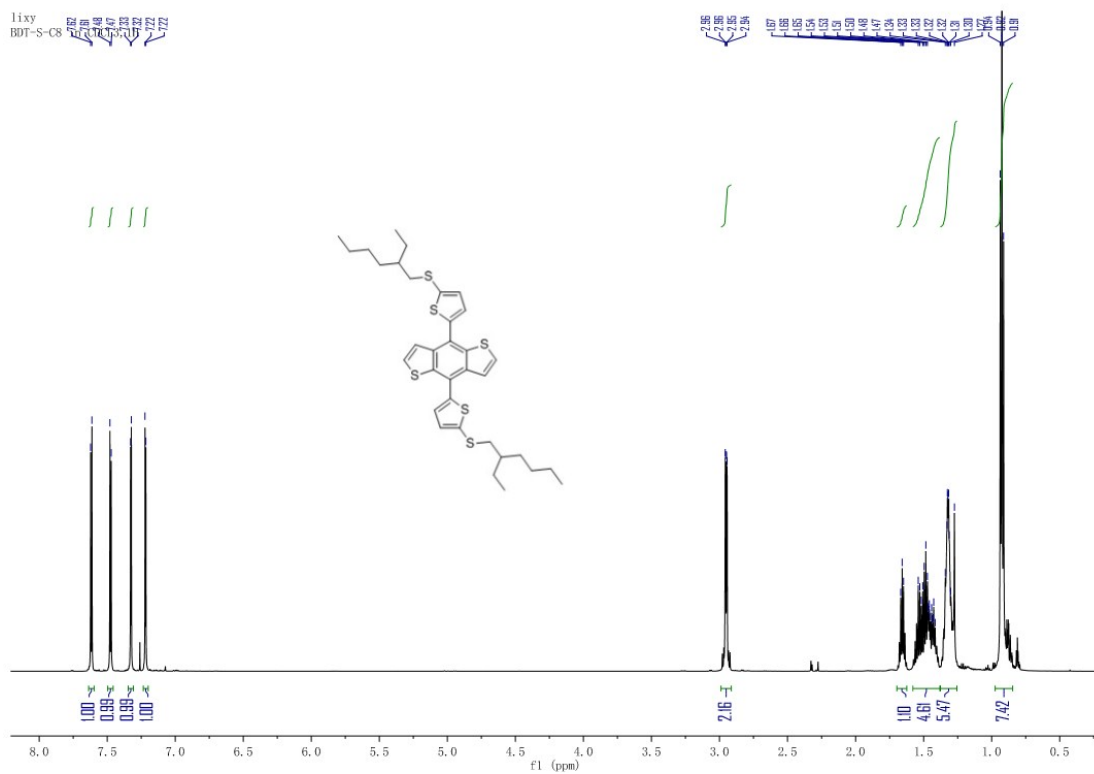

**Figure S12**  $^1\text{H}$ -NMR of BDT-TSEH



lixy  
PBDT-TSC8-Qx in CDCl<sub>3</sub>, 1H

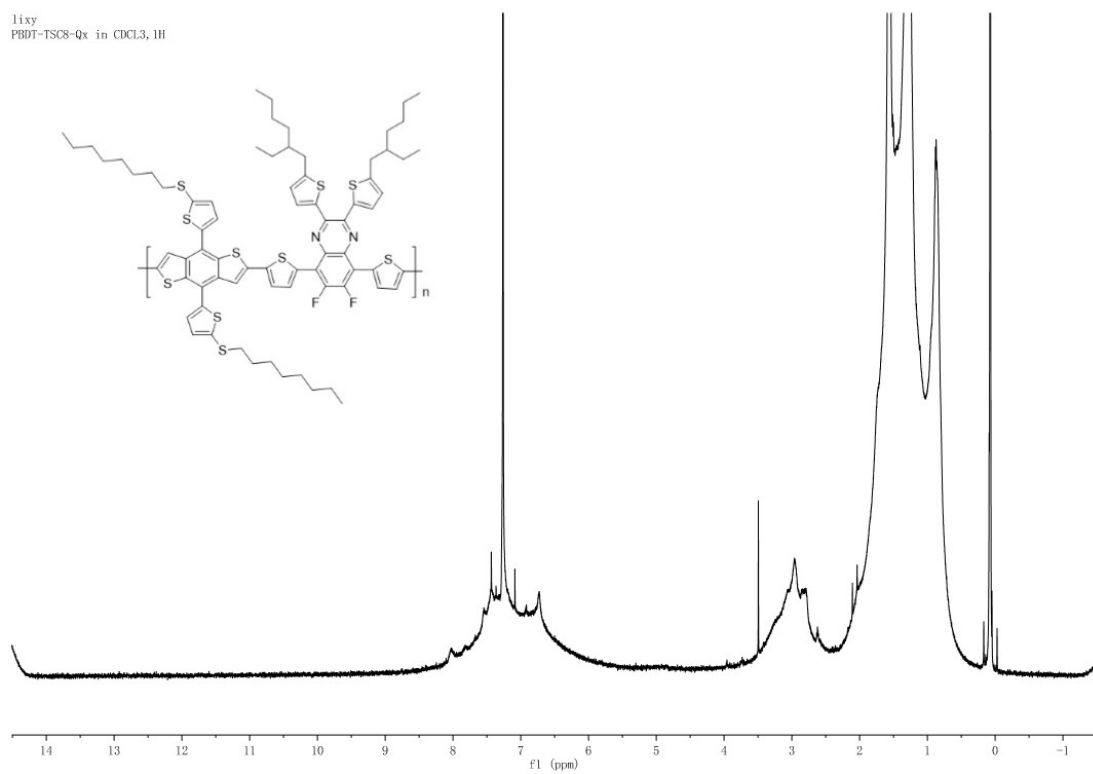

**Figure S15** <sup>1</sup>H-NMR of PBDT-DFQ<sub>x</sub>-TTSC8

lixy  
PBDT-TSEH-Qx in CDCl<sub>3</sub>, 1H

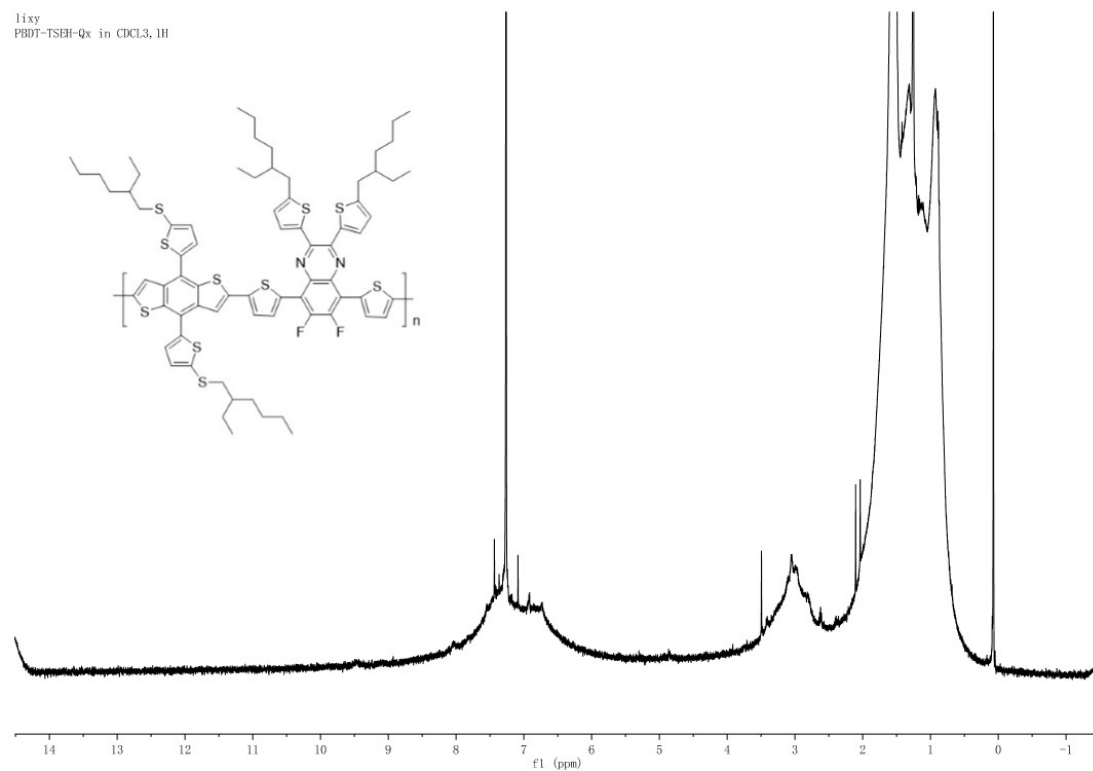

**Figure S16** <sup>1</sup>H-NMR of PBDT-DFQ<sub>x</sub>-TTSEH
